# Supplementary material for: International shipping in a world below 2oC
Source: Research Square preprint supplement (doi:10.21203/rs.3.rs-2958063/v1), 2023-06-01
Supplement: Supplementary file 1 [file d778446080fa05c332c6823e.docx]

International shipping in a world below 2oC

Supplementary Information

1. Short description of global IAMs and their approach of international shipping
   1. Overview

Table 1 shows key characteristics of the six global IAMs, while Table 2 reveals the energy carrier options for the international shipping sector represented in each model.

Table 1 – Key features of global IAMs

|  | **Version** | **#**  **of regions** | **Time horizon** | **Time step** | **Type** | **Solution method** | **Solution concept** | **Discount rate (%)** | **International shipping demand** |
| --- | --- | --- | --- | --- | --- | --- | --- | --- | --- |
| **COFFEE** | 1.5 | 18 | 2100 | 5 years until 2050, then, 10 years | Bottom-up | Intertemporal optimization with perfect foresight solved through linear programming | Partial equilibrium, focusing on energy, agriculture, and land use | 5 | Endogenous for main energy and agricultural products. General cargo driven by GDP |
| **IMACLIM-R** | 2.0 | 12 | 2100 | 1 year | Hybrid | Recursive dynamic (myopic) | General equilibrium (closed economy) | n/a | Endogenous to trade activities of all economic sectors |
| **IMAGE** | 3.2 | 26 | 2100 | 1 year | Bottom-up | Recursive dynamic | Partial equilibrium (price elastic demand) | 10 | Demand is projected with constant elasticity of the industry value added, and demand sensitivity to transport prices depends on its share of energy costs in the total service costs |
| **PROMETHEUS** | 1.2 | 10 | 2050 | 1 year | Hybrid | Recursive dynamic | Energy system simulation model, focusing on demand and supply | 8 | Semi-endogenous driven by trade of energy products and GDP developments |
| **TIAM** |  | 15 | 2100 |  |  |  |  |  |  |
| **WITCH** | 5.0 | 17 | 2100 | 5 years | Hybrid | Intertemporal optimization with perfect foresight | General equilibrium | Ramsey rate (3-5%) | Demand evolution is based on calibrated income and price elasticities |

Table 2 – Energy carrier options represented across IAMs

|  | COF | IMC | IMG | PMT | TIA | WTC |
| --- | --- | --- | --- | --- | --- | --- |
| Heavy Fuel Oil (HFO) | **X** | **X** | **X** | **X** | **X** | **X** |
| Marine Diesel Oil (MDO) | **X** | **X** | **X** | **X** | **X** | **X** |
| Straight Vegetable Oil (SVO) | **X** |  |  | **X** |  |  |
| Hydrotreated Vegetable Oil (HVO) | **X** |  | **X** | **X** |  |  |
| Fatty Acid Methyl Esters (FAME) | **X** |  |  | **X** | **X** |  |
| Biomass-to-Liquids Diesel (BtL-Diesel) | **X** | **X** | **X** | **X** |  |  |
| Biomass-to-Liquids Heavy (BtL-Heavy) | **X** |  |  |  |  |  |
| Hydrogen-Based Diesel (H2-Diesel) | **X** |  |  | **X** |  | **X** |
| Hydrogen-Based Heavy (H2-Heavy) | **X** |  |  |  |  |  |
| Fossil Liquefied Natural Gas (Fossil LNG) | **X** |  |  | **X** | **X** |  |
| Fossil Liquefied Petroleum Gas (Fossil LPG) | **X** |  |  |  |  |  |
| Fossil Methanol | **X** |  |  |  |  |  |
| Bio-Based Liquefied Natural Gas (Bio-LNG) |  |  |  | **X** |  |  |
| Biomass-to-Liquids Liquefied Petroleum Gas (BtL-LPG) | **X** |  |  |  |  |  |
| Biomethanol | **X** |  | **X** | **X** |  | **X** |
| Ethanol | **X** |  | **X** |  |  |  |
| Hydrogen-Based Liquefied Natural Gas (H2-LNG) |  |  |  | **X** | **X** |  |
| Hydrogen-Based Liquefied Petroleum Gas (H2-LPG) | **X** |  |  |  |  |  |
| Hydrogen-Based Methanol | **X** |  |  |  |  |  |
| Hydrogen | **X** |  | **X** | **X** | **X** | **X** |
| Ammonia | **X** |  |  | **X** | **X** |  |
| Electricity |  |  |  | **X** |  |  |

- 1. COFFEE
     1. General

COFFEE is a process-based1 Integrated Assessment Model (IAM) based on intertemporal linear programming optimization. The model is designed to represent the global energy, industrial, agricultural, and land-use systems, which are divided into 18 geographical regions. In essence, COFFEE seeks to find the least costly configuration of the represented systems that satisfies the various demands and constraints specified as input. For each geographical region, the model receives a range of input data, including demographic trends, demand for services (e.g., food, mobility, and thermal comfort), technological developments (e.g., cost and efficiency curves of energy converters), and resource availability (e.g., biomass, coal, and oil). At the same time, COFFEE receives a variety of constraints associated with environmental aspects (e.g., carbon budget), institutional aspects (e.g., existing public policies), and historical aspects (calibration). Using this data and a predetermined discount rate, COFFEE returns the optimal configuration of the global energy, industrial, agricultural, and land-use systems over the period 2010-2100 for the given conditions2–4.

In summary, the value of COFFEE as a modelling tool lies in its ability to identify the global minimum cost for expanding energy, industrial, agricultural, and land-use systems. By taking an integrated approach that considers the connections between these sectors, the model indicates mitigation strategies that are not limited to isolated sectors of the economy. As a result, the greenhouse gas (GHG) trajectories developed using this IAM are often distinct from those expected under a strictly sectoral perspective5,6.

- - 1. International shipping

Modelling maritime transportation presents a challenge due to the immense diversity of cargo (the Harmonized System lists over 5,000 product groups in international trade). In COFFEE, the modelling of the demand for international shipping is based on the following premises:

- The disaggregation of international trade according to physical (mass) or financial (value) criteria reveals significant differences. While commodities make up a considerable proportion of tonne-miles transported, their low added value causes their share to decrease considerably in the financial disaggregation. From the energy perspective adopted in COFFEE, a physical disaggregation of international shipping is more attractive.
- COFFEE is a modelling tool that places a strong emphasis on the energy sector, and its representation of energy chains is highly detailed. Given that energy cargoes account for nearly 40% of all international maritime transport tonne-miles7, the maritime transport module places significant importance on these products.
- Some agricultural products (especially grains) are endogenously represented in COFFEE while also accounting for a significant fraction of international trade. For these commodities, demand for maritime transport is modelled endogenously.
- Container ships play a major role in international maritime transport, accounting for roughly 15% of total tonne-miles and consuming about 30% of the sector's final energy. Hence, an accurate representation of these vessels in the model is crucial.

Based on these premises, the list of products and associated vessels represented in COFFEE is shown in Table 3. The IMO GHG emissions inventory is used as a basis for historical calibration.

Table 3 – International shipping products represented in the COFFEE model

| **Product** | **Vessel type** | **Demand type** |
| --- | --- | --- |
| Light crude oil | Tankers | Endogenous |
| Medium sweet crude oil | Tankers | Endogenous |
| Medium sour crude oil | Tankers | Endogenous |
| Heavy crude oil | Tankers | Endogenous |
| Extra-heavy crude oil | Tankers | Endogenous |
| Fossil naphtha | Tankers | Endogenous |
| Green naphtha | Tankers | Endogenous |
| Fossil kerosene | Tankers | Endogenous |
| Green kerosene | Tankers | Endogenous |
| Fossil diesel | Tankers | Endogenous |
| Green diesel | Tankers | Endogenous |
| Fossil fuel oil | Tankers | Endogenous |
| Green fuel oil | Tankers | Endogenous |
| Fossil natural gas | Gas carriers | Endogenous |
| Green natural gas | Gas carriers | Endogenous |
| Bituminous coal | Bulk carriers | Endogenous |
| Sub-bituminous coal | Bulk carriers | Endogenous |
| Ethanol | Chemical tankers | Endogenous |
| Hydrogen | LH2 ships | Endogenous |
| Wheat | Bulk carriers | Endogenous |
| Maize | Bulk carriers | Endogenous |
| Rice | Bulk carriers | Endogenous |
| Soybean | Bulk carriers | Endogenous |
| Other cereals | Bulk carriers | Endogenous |
| Steel | General cargo ships | Endogenous |
| Iron ore | Bulk carriers | Exogenous |
| Chemical products | Chemical tankers | Exogenous |
| Containers | Containerships | Exogenous |
| Vehicles | Pure Car Carriers | Exogenous |
| - | Cruise ships | Exogenous |
| Other | Bulk carriers | Exogenous |

The energy modelling of ships is based on actual Energy Efficiency Operational Index (EEOI) values from the 4th IMO GHG inventory8. Combined with emission factors of conventional fuels, EEOI values can provide an estimation of engine brake energy per transport work (kWh/t-nm) for different cargoes/ship types. Combined with information on shipping distances and costs, these values allow the modelling of ten illustrative vessel motorizations. Each of these motorizations can work with specific fuels. In their turn, these fuels are divided into eight groups (bunker-like, diesel-like, ethanol, methanol, LNG, LPG, ammonia, and hydrogen). Like the rest of the energy system, the production of these fuels is modelled in the 18 regions of the COFFEE model. Most groups consist of fuels that can originate from either fossil or renewable sources.

- 1. IMACLIM-R
     1. General

IMACLIM-R is a **multi-sectoral Computable General Equilibrium (CGE) model**, hybrid with bottom-up sectoral modules (fossil fuel extraction, electricity, buildings, and transport). It represents the global economy as a set of 12 interconnected regional and national economies, each composed of 12 production sectors (also connected by input-output and trade links). It is primarily based on macroeconomic theory and draws inspiration from the Arrow-Debreu model, specifically regarding its emphasis on equilibria. It features consistent input-output accounting of both economic and physical energy flows, achieved by reconciling energy balances and national accounting data. The model simulates dynamic trajectories in yearly steps through the recursive and hard-linked succession of static macroeconomic equilibria and bottom-up sectoral modules. It explicitly represents the constraints affecting technical flexibilities and their interplay with macroeconomic trajectories by describing economic patterns in a world with market imperfections, partial use of production factors (labour and capital) and imperfect expectations for investment decisions. Within macroeconomic equilibria, a representative household in each regional economy aims to maximize its utility while considering economic and time budget constraints. To meet demand, productive sectors operate under short-term technical and productive capacity limitations. Between two economic equilibria, bottom-up modules use explicit technologies for the electricity and transport sectors to simulate technical adjustments to demand and price changes, considering imperfect foresight. The model utilizes a bottom-up approach for the representation of different power-producing technologies in the electricity sector, while energy-related technologies for buildings and road transport are taken into account on the demand side9,10.

- - 1. International shipping

The IMACLIM-R model represents the dynamics of the **maritime sector** through several distinct processes. Firstly, freight demand is influenced by international trade volumes of physical goods, particularly industrial and energy goods, which are determined by the structure of the world economy (including the degree of openness and distribution of production and consumption poles). Additionally, the price of freight transport, which is strongly influenced by energy carrier prices and energy efficiency, also affects freight demand. The technological advancement of the maritime fleet, such as the energy sources used and energy efficiency, is mainly determined by the relative prices of energy, including carbon taxation, and exogenous hypotheses for energy efficiency improvements. The current version of the model considers two types of energy carriers: conventional marine fuels and synthetic drop-in biofuels9,10.

- 1. IMAGE
     1. General

IMAGE (Integrated Model to Assess the Global Environment) is a process-oriented integrated assessment model (IAM), providing an intermediate complexity representation of human and earth systems. The key components of the human system that largely contribute to greenhouse gas emissions are the energy system and the agricultural and land systems. The main drivers for the human system are demographic, economic, and technological developments, as well as resource availability, lifestyle changes and policy. For the earth system, the modelling framework is used to describe land cover, crop growth, carbon and water cycles and climate. The human and earth systems are interconnected by emissions and land use. The socio-economic processes and most of the human system parameters are described at the level of 26 world regions, while the earth system is modelled on a 5x5 minute grid for land use and land-use changes and on a 30x30 minute grid for plant growth and the carbon and water cycles. IMAGE operates in annual time steps and, as such, is suitable for long-term climate mitigation assessments up to 210011.

The IMage Energy Regional (TIMER) model has been developed to explore scenarios for the energy system in the broader context of the IMAGE framework. TIMER describes 12 primary energy carriers in 26 world regions and is used to analyse long term trends in energy demand and supply in the context of the sustainable development challenges. The model simulates long-term trends in energy use, issues related to depletion, energy-related greenhouse gas and other air polluting emissions, together with land-use demand for energy crops. Based on historical trends, the demand for travel, housing, and specific materials described and related to regional economic and price developments, cultural factors, and demographic development. These services can be provided or produced in various ways, depending on resource availability, technology development, operation, and availability, amongst other things. The focus is on dynamic relationships in the energy system, such as inertia and learning-by-doing in capital stocks, depletion of the resource base and trade between regions. Like other IMAGE components, TIMER is a simulation model. The results obtained depend on a single set of deterministic algorithms, according to which the system state in any future year is derived entirely from previous system states.

- - 1. International shipping

The transport submodule consists of two parts – passenger and freight transport. Passenger transport modes include buses, bicycles, motorcycles, walking, trains, passenger vehicles and aircraft, and which mode people choose may depend on personal preferences, as well as on costs. If, for example, air travel would become more expensive due to the implementation of air passenger tax, or conversely would become cheaper due to technological developments, the kilometres travelled by air may decrease or increase, respectively. The freight transport submodule has a simpler structure. Service demand is projected with constant elasticity of the industry value added for each freight transport mode. In addition, demand sensitivity to transport prices is considered for each mode, depending on its share of energy costs in the total service costs. There are six freight transport modes: international shipping, domestic shipping, train, heavy truck, medium truck, and aircraft. In both passenger and freight submodules, vehicles with different energy efficiencies, costs, and fuel type characteristics, compete based on preferences and total passenger-kilometre costs, using a multinomial logit equation. These substitution processes describe the price induced energy efficiency changes. Over time efficient technologies become more competitive due to exogenous assumed decrease in cost, representing the autonomous induced energy efficiency. The efficiency of the transport fleet is determined by a weighted average of the full fleet (a vintage model, giving an explicit description of the efficiency in all single years). As each type of vehicle is assumed to use only one (or in case of a hybrid vehicle two) fuel type, this process also describes the fuel selection12.

- 1. PROMETHEUS
     1. General

PROMETHEUS is a global energy system model covering in detail the complex interactions between energy demand, supply, and energy prices at the regional and global level. Its main objectives are: (1) to assess climate change mitigation pathways and low-emission strategies for the medium and long term; (2) analyse the energy system, economic, technology, and emission implications of a wide spectrum of energy and climate policy measures, differentiated by region and sector; and (3) quantify the impacts of climate policies on the evolution of global energy prices. PROMETHEUS quantifies CO2 emissions and incorporates emission abatement technologies (such as renewable energy, electric vehicles, Carbon Capture and Storage, energy efficiency, green hydrogen) and policy instruments, such as carbon pricing schemes or energy efficient standards that may differentiate by region and economic activity. The model can be used to assess energy and climate policies, as it endogenously represents detailed world and regional supply/demand dynamics and technology dynamics mechanisms focusing on low-carbon technologies (e.g., wind, solar PV, electric cars, CCS, advanced biofuels, hydrogen). PROMETHEUS is a recursive dynamic energy system simulation model. The economic decisions regarding the investment and operation of energy system are based on the current state of knowledge of parameters (costs and performance of technologies, etc.) or with a myopic anticipation of future costs and constraints. The PROMETHEUS model assumes market equilibrium, where each representative agent (e.g., energy producer or consumer) uses information on prices and makes decisions about the allocation of resources. The interactions of representative agents are governed by market dynamics with market derived prices to balance energy demand and supply in each sector (e.g., electricity production, transport, and energy industries). The regional fuel markets are integrated to form an international (global or regional) market equilibrium for crude oil, natural gas, and coal. The model produces projections of global and regional fuel prices, which depend on demand, supply, technology, and resources. PROMETHEUS is designed to provide medium- and long-term energy system projections and system restructuring up to 2050, both in the demand and the supply sides. The model produces analytical quantitative results in the form of detailed energy balances in the period 2020 to 2050 annually. The model can support impact assessment of specific energy and environment policies and measures, applied at regional and global level, including price signals, such as taxation, subsidies, technology, and energy efficiency promoting policies, RES supporting policies, environmental policies, and technology standards.

- - 1. International shipping

PROMETHEUS is significantly enhanced with an improved representation of international maritime, based on more granular modelling, the inclusion of various technologies, emission reduction options and low-emission fuels, and the integration of new data and information on mitigation potentials and activity projections from recent literature. In the shipping sector, PROMETHEUS distinguishes inland navigation and international shipping; activity in the latter is split by shipping segments, i.e., dry bulk carriers, general cargo, containers, and tankers. In the latter, activity is endogenously estimated in PROMETHEUS, driven by the regional trade of fossil fuels, while in other shipping segments activity is exogenous, calculated using GEM-E3 bilateral trade projections13 mapped into PROMETHEUS regions. The activity of tankers depends on the evolution of fossil fuel trade across regions, which is determined endogenously as part of the global energy demand and supply projections of PROMETHEUS. This allows us to analyse the linkages between domestic climate policy and international shipping through the reduction of demand and thus international trade of fossil fuels.

In addition to the conventional fossil fuels (RFO, marine gas oil or LNG), new, low-emission, sustainable fuel types and clean vessel technologies are introduced in the model (e.g., biofuels, synthetic e-fuels, ammonia, hydrogen), whose uptake is triggered by ambitious climate policies and the introduction of emission or technology standards. The different technologies and fuels compete based on the evolution of their total costs, including capital, operating, fuel and carbon costs, technical efficiencies, energy densities and other characteristics (e.g., infrastructure barriers, innovation potentials). Energy efficiency is represented endogenously, based on technological improvement, operational efficiency, engine improvements, and increased energy prices. The various emission reduction options, including energy saving possibilities, speed reduction, and use of alternative low-emission fuels are introduced in the model, based on data from PRIMES-Maritime model14, enabling PROMETHEUS to quantify the transformational dynamics in the shipping sector towards deep decarbonization.

- 1. TIAM-UCL
     1. General

TIAM-UCL15 is an energy-economy model of the global energy system. It is built in the TIMES framework, a modelling framework that uses a linear programming optimisation approach to explore cost-optimal systems. Features of this formulation include perfect competition (no market power held by specific firms) and perfect foresight (market players have all information, now in the future, to inform investment decisions).

The representation of the global energy system includes primary energy sources (oil, gas, coal, nuclear, biomass, and renewables) from production through to their conversion (e.g. electricity production), their transport and distribution, and their eventual use to meet energy demands across a range of economic sectors. Using a scenario-based approach, the evolution of the system to meet future energy service demands (including mobility, lighting, residential and industrial heat and cooling), can be simulated, driven by the least-cost objective solution.

The model splits the globe up into 16 regions which allows for a detailed characterisation of regional energy sectors, and the trade flows between them. Future demands for energy services, which vary due to population, economic growth, and behavioural changes, drive the evolution of the energy system that must meet these demand requirements. These demands are dynamic, in that they can rise or fall in response to changes in the cost of providing energy services via the use of long run price elasticities. The model can also be hard linked to a simple CGE model to assess impacts of the energy system on the broader economy, and the subsequent feedback on energy demand. These two last features were not used in the present research.

Decisions around what energy sector investments to make across regions to meet these demands are determined based on the most cost-effective investments, considering the existing system in 2015, energy resource potential, technology availability, and crucially policy constraints such as emissions reduction targets or carbon budgets. The model solves to minimise the discounted total system cost over the full-time horizon of the model (ending in 2100), based on a discount factor of 3.5%.

- - 1. International shipping

The transport sector in TIAM-UCL is fully based on a cost-optimisation paradigm; it does not capture the preferences of consumers, vehicle purchase decisions are made based on capital, maintenance, and fuel costs alone. The model provides useful insights into the evolution of the transport sector and its implications on the whole energy system. The transport sector is characterized by 14 energy-services plus one non-energy use demand segment. The road transport sector considers two- and three-wheels vehicles, cars, light duty vehicles, commercial, medium, and heavy trucks, and buses. Additionally, the model considers rail transport of passengers and freight, domestic and international navigation as well as domestic and international aviation. The shift between transport modes is not possible in the standard TIAM-UCL version; each service demand is an exogenous model input (except for part of the international shipping sector as explained later). There is a range of fuels represented in TIAM-UCL to supply existing and new transport technologies, for all transport service demands: coal, natural gas, LPG, gasoline, diesel, kerosene, heavy fuel oil, electricity, bioethanol, biodiesel, hydrogen, various synthetic fuels, and methanol. These fuels have a supply chain and system architecture associated, from the upstream sector through to end-use services.

More precisely, for the shipping sector, TIAM-UCL distinguishes domestic and international shipping, the latter is the sector analysed in this study. The activity in the international shipping is split by trade types as followed: non-energy commodities transport and energy related commodities. For the first subsector (non-energy commodities) activity is exogenous, calculated and mapped into TIAM-UCL regions using trade projections from the sectoral model GloTraM16 developed at UCL. For the energy commodities related trade, activity is endogenously estimated in model, driven by the international trade of fossil fuels and other energy vectors (e.g., low carbon fuel or biomass for bioenergy feedstock). In addition to conventional fossil fuels (HFO, diesel, gasoline, and LNG) the sector can access new, low-emission, sustainable fuel types (biodiesel, synfuels (diesel, gasoline, or LNG), ammonia or hydrogen). The emission reduction by use of alternative low-emission fuels is based on fuel price, carbon prices and feedstock/policy constraints introduced in the model. Ship and logistic efficiency (technological and operational improvements) are introduced exogenously in the model extracted from GloTraM scenarios.

- 1. WITCH
     1. General

The WITCH integrated model is a comprehensive tool designed to examine the complex interplay between climate change, energy systems, and economic development. With a hybrid structure that combines top-down economic representation and bottom-up energy system detail, it is a valuable resource for policymakers and researchers.

WITCH is a hybrid model that merges a top-down representation of the economy with a bottom-up representation of the energy system. The top-down component includes an intertemporal optimization model that accounts for macroeconomic interactions and dynamics, while the bottom-up component captures the technological details of the energy sector. The model employs a cost-effectiveness optimization method to minimize total discounted global costs associated with meeting specific climate and energy objectives. This approach considers various factors, such as investment, capital, and operational costs, in addition to climate change damages and policy costs like carbon pricing.

The model divides the world into representative native regions or coalitions and generates optimal mitigation and adaptation strategies from 2005 to 2100 in response to climate damage or emission constraints. Strategies result from a maximization process involving regional welfare, capturing regional free-riding behaviours and strategic interactions induced by global externalities. An iterative algorithm implements the open-loop Nash equilibrium in a non-cooperative, simultaneous, open membership game with full information.

WITCH features endogenous R&D diffusion and innovation processes for energy efficiency and carbon-free technologies, capturing multiple externalities in climate and innovation. Technology externalities are modelled through international spill overs of knowledge and experience. Low carbon mitigation technologies and energy productivity in each country depending on the region's energy R&D stock and global cumulative installed capacity. The model uses a social planner to maximize the sum of regional discounted utility, with a constant relative risk aversion (CRRA) utility function derived from per-capita consumption. The economy produces a single commodity, with final goods produced via a nested CES function combining capital, labour, and energy services. Climate impacts affect gross output, with fossil fuel and GHG mitigation costs subtracted from them. Energy services are provided by a combination of physical energy input and a stock of energy efficiency knowledge.

The energy system in WITCH is characterized by a detailed representation of primary energy sources, conversion technologies, and end-use sectors. It includes a wide range of energy carriers (e.g., coal, oil, natural gas, nuclear, and renewables) and technologies for power generation, transportation, and other end-use sectors. The model also captures technological progress and energy efficiency improvements over time.

- - 1. International shipping

The transportation sector in the model includes road transport (both passenger-duty vehicles and heavy-duty vehicles), international aviation, and a preliminary version of international shipping. Currently, Shipping demand for each region in the base year is the total global demand allocated with respect to its GDP share [tonne. mile/year]. Then, demand for future time steps is estimated by using the elasticity of GDP (as a proxy of income). Elasticities are distinguished for different cargo types in the model. Also, regions are divided into high-income, mid-income, and low-income, and each one of them has specific income elasticity on demand. Efficiency improvement of the fleet is exogenous, kept constant at around 2%/year. On the supply side, the sector has only access to oil-based traditional fuels, biofuels, hydrogen, and renewable hydrocarbons, and ships have fixed investment expenses.

The international shipping module within the model is currently in its early stages and remains highly aggregated. Ongoing development aims to enhance the module by incorporating bilateral trade analysis between regions/countries, identifying elasticities affecting individual trade demand types, modelling port demand areas for future expansion and associated investment requirements, vessel categories and their specific parameters as well as potential cost reduction, establishing production infrastructure and supply chains for more alternative fuels options (e.g., ammonia, bio-LNG, etc.).

1. Comparison of adopted carbon budgets with the Sixth Assessment Report (AR6) of the IPCC

The choice of carbon budget values is based on model capabilities and warming categories, as defined by the IPCC in its latest assessment report 17,18. As indicated by Table 4, **C600** scenarios can be seen as in line with a warming of 1.5oC or slightly above (since it lies between C1 and C2) while **C1000** scenarios would reflect a world likely below 2oC (lying between C3 and C4). More ambitious carbon budgets (e.g., 400 GtCO2) are not used because most of our models are currently not able to find solutions below 600 GtCO2, especially with a peak budget (i.e., without overreliance on CDR). Finally, it is worth noting that none of the scenarios include IMO2050 as a restriction, since one of our aims is to compare the model results to this target.

Table 4 – IPCC AR6 warming categories

| **Category** | **Description** | **Cumulative CO2 emissions (Gt)** | |
| --- | --- | --- | --- |
| **2020 to net zero CO2** | **2020-2100** |
| C1 | Limit warming to 1.5oC (>50%) with no or limited overshoot | 510 [330 to 710] | 320 [-210 to 710] |
| C2 | Return warming to 1.5oC (>50%) after a high overshoot | 720 [530 to 930] | 400 [-90 to 620] |
| C3 | Limit warming to 2oC (>67%) | 890 [640 to 1,160] | 800 [510 to 1,140] |
| C4 | Limit warming to 2oC (>50%) | 1,210 [970 to 1,490] | 1,160 [700 to 1,490] |

1. Detailed results for Bioenergy with Carbon Capture and Storage (BECCS)

Except for PROMETHEUS (whose time horizon is 2050), all models project international shipping emissions to approximately stabilize in the second half of the century, both in **C1000** and **C600** scenarios. This pattern is due to the rise of Bioenergy with Carbon Capture and Storage (BECCS) after 2040. As explained before, our carbon budget scenarios do not allow net negative emissions. However, this does not exclude the use of some level of CDR strategies in these scenarios. In a peak-budget scenario, once the carbon budget is depleted, eventual residual emissions must necessarily be compensated by CDR strategies to hold net CO2 emissions equal to zero. In the pathways modelled by our IAMs, this is ensured by the deployment of BECCS, with CO2 removals in the range of 1.6-9.6 Gt/yr in 2050, 4.1-14.5 Gt/yr in 2070 and 3.6-18.4 Gt/yr in 2090. In the case of WITCH, Direct Air Capture with Carbon Storage (DACCS) also plays a relevant role, with global removals in 2070 around 1.0 GtCO2/yr (**C1000** scenario) and 1.7 GtCO2/yr (**C600** scenario). Typically, BECCS and DACCS gradually escalate between 2040 and 2060, reaching their height towards the end of the century. In Figures 1-6, we compare the annual CO2 removal by BECCS with residual CO2 emissions from shipping in 2050, 2070 and 2090. While shipping annual emissions are comparable to BECCS in 2050, they are no more than 13% of the CDR achieved by BECCS in 2090. This finding should be tempered by the uncertainties surrounding the large-scale deployment of BECCS (e.g., land and water requirements19,20) and DACCS (e.g., chemicals availability, technological maturity and water requirements21,22). Restrictions on the diffusion and implementation of these technologies would mean a higher decarbonisation pressure on the shipping sector.

Figure 1 – International shipping emissions (dark) compared to annual CO2 removal through BECCS in 2050 (light). Red triangles indicate the proportions between these two values – C1000 scenarios

Figure 2 – International shipping emissions (dark) compared to annual CO2 removal through BECCS in 2070 (light). Red triangles indicate the proportions between these two values – C1000 scenarios

Figure 3 – International shipping emissions (dark) compared to annual CO2 removal through BECCS in 2090 (light). Red triangles indicate the proportions between these two values – C1000 scenarios

Figure 4 – International shipping emissions (dark) compared to annual CO2 removal through BECCS in 2050 (light). Red triangles indicate the proportions between these two values – C600 scenarios

Figure 5 – International shipping emissions (dark) compared to annual CO2 removal through BECCS in 2070 (light). Red triangles indicate the proportions between these two values – C600 scenarios

Figure 6 – International shipping emissions (dark) compared to annual CO2 removal through BECCS in 2090 (light). Red triangles indicate the proportions between these two values – C600 scenarios

1. Fuel aggregation

In recent years, international shipping demanded on average 9 EJ/yr of fossil energy, with 95% of this total coming from two petroleum products, Heavy Fuel Oil (HFO) and Marine Diesel Oil (MDO)8. In terms of gross tonnage, 95% of the existing fleet and 67% of the order book are composed by vessels based on conventional powertrains, i.e., compression ignition engines suited to HFO, MGO and similar fuels 23. Moreover, most oceangoing ships in operation are less than 15 years old, meaning that the world fleet will likely maintain its fuel technological standard until 2035, at the very least.

Over the last decade, LNG started to be regarded as the main alternative to conventional bunker fuels, especially because of its low impact when it comes to atmospheric pollution (e.g., SOx). Although HFO and MGO are still dominant, the dissemination of dual-fuel engines has been gradually increasing LNG’s share in the world fleet. As of today, more than 5% of the existing fleet and 30% of the order book correspond to vessels designed to use LNG. Nevertheless, the mitigation potential of natural gas is relatively poor, with a carbon intensity slightly lower than that of petroleum products24. Furthermore, depending on engine types, methane slip can make LNG’s overall climate performance equal or worse than that of HFO and MGO 24.

In scenarios projecting a deep decarbonization of shipping, there is typically a marine fuel switch towards low-carbon alternatives. However, across scenarios, these alternatives vary widely both in terms of primary resources and final energy carriers, making the role of low-carbon fuels relatively unclear. Since energy balances and low-carbon technologies lie at the heart of IAMs, we concentrate our analysis on this aspect, investigating how the marine fuel mix should evolve throughout the next decades to be compatible with carbon budgets of 600 and 1,000 GtCO2.

Since the modelling of fuel conversion processes is not identical across the six IAMs, we use energy carrier categories to harmonize and compare our results (Table 4). These categories seek to group fuels according to common features, such as feedstock type, energy density and applicability. The **Conv** category, for example, corresponds to conventional fuels based on petroleum, such as HFO and MDO. The **Oilseed** category represents fuels based on vegetable oils obtained from the seed of plants such as palm, soybean, and sunflower, and eventually also from animal fats such as beef tallow. The **D-synt bio** and **D-synt other** categories include fully drop-in renewable fuels produced through advanced processes such as the Fischer-Tropsch synthesis that are chemically indistinguishable from HFO/MDO. While the former relates to biobased feedstocks, the latter includes every other type of resource, most notably renewable-based electricity. The three **AG** categories correspond to groups of alcohols and gases (e.g., ethanol, methanol, and LNG), whose use in ships is typically made possible using dual-fuel engines. As in the case of drop-in fuels, they differ from each other by the type of primary source. Finally, the **H2/NH3** category corresponds to hydrogen and ammonia, while the **Elec** category refers to the direct use of electricity.

| **Group** | **Description** | **Examples** |
| --- | --- | --- |
| **Conv** | Conventional marine fuels | Heavy Fuel Oil (HFO)  Marine Diesel Oil (MDO)  Marine Gas Oil (MGO) |
| **Oilseed** | Animal fats- and oilseed-based fuels | Biodiesel  Hydrotreated Vegetable Oil (HVO)  Straight Vegetable Oil (SVO) |
| **D-synt bio** | Synthetic drop-in biofuels | Biomass-to-Liquids diesel (BtL-diesel)  Biomass-to-Liquids heavy (BtL-heavy) |
| **D-synt other** | Other drop-in synthetic fuels | Power-to-Liquids diesel (e-diesel)  Power-to-Liquids heavy (e-heavy) |
| **AG-fos** | Fossil alcohol and gases | Fossil Liquified Natural Gas (LNG)  Fossil Liquefied Petroleum Gas (LPG)  Fossil methanol |
| **AG-bio** | Bio-alcohols and biogases | Bio-LNG  Biomethanol  Ethanol |
| **AG-synt** | Synthetic alcohols and gases | Power-to-Gas LNG (e-LNG)  Power-to-Gas LPG (e-LPG)  Power-to-Liquids methanol (e-methanol) |
| **H2/NH3** | Hydrogen and ammonia | Hydrogen  Ammonia |
| **Elec** | Electricity | Electricity |

1. Detailed results for Europe
   1. PRIMES-Maritime

The aim of the PRIMES-Maritime model is to perform long-term energy and emission projections, until 2050, for each EU MS separately. The coverage of the model includes the European intra-EU maritime sector as well as the extra-EU maritime trade. PRIMES-Maritime focuses only on the EU MS and the extra-EU trade coming in and out of the EU. The model consists of a modular structure:

1. The **demand module** projects maritime activity for each EU MS by type of cargo and by corresponding partner. Econometrical functions relate future demand for maritime transport services with economic drivers including GDP, energy demand (oil, coal, LNG), international fuel prices, and bilateral trade by type of product.
2. The **supply module** simulates a virtual operator controlling the EU fleet, which performs the requested maritime transport services and allocates the vessels to activities in the various markets (the EU MS and the extra-EU area that trades with the EU) where different regulatory regimes may apply (e.g., ECA zones).

The policy input includes emissions (CO2, air pollution) and energy efficiency standards (EEDI for new vessels, SEEMP), fuel standards and potential fuel mandates. The fleet of vessels disaggregates into several categories depending on cargo types.

The model is dynamic solving for the balance between supply and demand, considering vessel vintages and fleet renewal requirements with a stock-flow relationship. Capital turnover is explicit in the model influencing the pace of fuel substitution. Choice of fuel mix for new vessels is based on technoeconomic assumptions applying discrete choice modelling. The model projects bunkers consumption across fuel types and derived WtT and TtW GHG emissions, including methane slippage emissions from combustion. Energy consumption is based on specific fuel consumption functions, which use cost-efficiency curves to summarize efficiency possibilities.

- 1. EU region results

This subsection presents results for the EU region based on the bottom-up model PRIMES-Maritime. The model projects energy and ship-generated emissions until 2050, covering intra-European and extra-European maritime shipping activity. While regional in scope, the modelling results can shed light onto the fuel and technology portfolio required to decarbonize the European maritime sector25.

Three scenarios are quantified with PRIMES-Maritime and are aligned with the scenario narratives of the global IAMs presented in the article, namely:

- **NDCi**:represents a “no policy change” scenario largely aligned with the EU Reference scenario 202026, reflecting EU and national policies adopted by the end of 2019
- **NDCi_1000**:aligned with an ambitious emission reduction trajectory in which policies are in place (e.g., technology neutral GHG emissions reduction target for the bunker fuel mix, carbon price), and is closely aligned with the region’s ambition to achieve net zero emissions by mid-century27
- **NDCi_600**: which includes a more ambitious GHG emissions reduction trajectory compared to NDCi_1000, such that the international maritime sector complies with more stringent carbon budgets in the period to 2050

The results show a reduction in energy demand, owing primarily due to the adoption of more efficient technologies and partly due to a reduction in activity of about 2% lower in the decarbonization scenarios compared to NDCi in 2050. The reduction in energy demand in the decarbonization scenarios compared to the no policy change scenario is already noticeable in 2025, when alternative and more costly fuels penetrate the bunker fuel mix, and the difference increases over the time horizon (i.e., about 14% in 2050) (Figure 7).

Figure 7 – Energy demand in the EU international maritime sector

In 2050, the composition of bunker fuels differs drastically between the scenarios. In the NDCi, fossil fuels maintain their high share, as they comprise 99% of the fuel mix (80% conventional liquid and 19% gaseous fuels). In the decarbonization scenario NDCi_1000, biofuels make up about 46% of the mix, in their majority as drop-in liquid fuels, synthetic fuels contribute about 33% and electricity makes up the reminder 2% of the alternative fuel mix. In NDCi_600 the more stringent carbon budget leads to an additional uptake of synthetic fuels mainly to the detriment of fossil fuels, but also to biomethane and H2 and NH3 (Figure 8). Consumption of alternative fuels is about 12% higher in NDCi_600 compared to NDCi_1000.

Figure 8 – EU international maritime bunker fuel composition in 2050

The projections show that in NDCi, without efforts to decarbonize the EU maritime sector, emissions may reach 0.17 GtCO2 in 2050, growing by 0.7% annually. Cumulative emissions may reach almost 4 GtCO2 in the period 2021-2050. With long-term decarbonization efforts, the emissions peak in 2025 and decline by 6% annually in NDCi_1000 or 10% annually in NDCi_600 so as to reach 0.03 GtCO2 and 0.01 GtCO2 in 2050, respectively. The difference on cumulative emissions between the decarbonization scenarios is comparably small as NDCi_600 leads to lower cumulative emissions by 7% (or 0.16 GtCO2 in 2021-2050) compared to NDCi_1000. Compared to NDCi, cumulative emissions are notably lower (i.e., between 38 and 42%), driven by the early adoption of measures that lead to the decarbonization of the bunker fuel mix (Figure 9).

Figure 9 – CO2 emissions trajectory and cumulative CO2 emissions across scenarios

References

1. van Beek, L., Hajer, M., Pelzer, P., van Vuuren, D. & Cassen, C. Anticipating futures through models: the rise of Integrated Assessment Modelling in the climate science-policy interface since 1970. *Glob. Environ. Chang.* **65**, 102191 (2020).

2. IAMC. Model Documentation - COFFEE-TEA. https://www.iamcdocumentation.eu/index.php/Model_Documentation_-_COFFEE-TEA (2019).

3. Rochedo, P. R. R. *et al.* Is Green Recovery Enough? Analysing the Impacts of Post-COVID-19 Economic Packages. *Energies* vol. 14 (2021).

4. Draeger, R. *et al.* Stranded crude oil resources and just transition: Why do crude oil quality, climate ambitions and land-use emissions matter. *Energy* **255**, 124451 (2022).

5. Rochedo, P. R. R. Development of a Global Integrated Energy Model to Evaluate the Brazilian Role in Climate Change Mitigation Scenarios. *Journal of Chemical Information and Modeling* (2016). doi:10.1017/CBO9781107415324.004.

6. Byers, E. *et al.* AR6 Scenarios Database. (2022) doi:10.5281/zenodo.5886912.

7. UNCTAD. *Handbook of Statistics 2022*. https://unctadstat.unctad.org/EN/Index.html (2022).

8. Faber, J. *et al.* *Fourth IMO GHG Report*. *International Maritime Organization* (2021).

9. Waisman, H., Guivarch, C., Grazi, F. & Hourcade, J. C. The Imaclim-R model: infrastructures, technical inertia and the costs of low carbon futures under imperfect foresight. *Clim. Change* **114**, 101–120 (2012).

10. Méjean, A., Guivarch, C., Lefèvre, J. & Hamdi-Cherif, M. The transition in energy demand sectors to limit global warming to 1.5 °C. *Energy Effic.* **12**, 441–462 (2019).

11. IAMC. Model Documentation - IMAGE. https://www.iamcdocumentation.eu/index.php/Model_Documentation_-_IMAGE (2023).

12. Edelenbosch, O. Y. *et al.* *Mitigating greenhouse gas emissions in hard-to-abate sectors*. (2022).

13. Paroussos, L., Fragkos, P., Capros, P. & Fragkiadakis, K. Assessment of carbon leakage through the industry channel: The EU perspective. *Technol. Forecast. Soc. Change* **90**, 204–219 (2015).

14. European Commission. *Proposal for a Regulation of the European Parliament and of the Council on the Use of Renewable and Low-Carbon Fuels in Maritime Transport and Amending Directive*. https://ec.europa.eu/info/sites/default/files/fueleu_maritime_-_green_european_maritime_space.pdf (2021).

15. Pye, S. *et al.* *The TIAM-UCL Model (Version 4.1.1) Documentation*. https://www.ucl.ac.uk/drupal/site_energy-models/sites/energy-models/files/tiam-ucl-manual.pdf (2020).

16. UCL. GloTraM. *UCL Energy Institute Models* https://www.ucl.ac.uk/energy-models/models/glotram (2023).

17. IPCC. Summary for Policymakers. in *Climate Change 2022: Mitigation of Climate Change. Contribution of Working Group III to the Sixth Assessment Report of the Intergovernmental Panel on Climate Change* (eds. Shukla, P. R. et al.) (Cambridge University Press, 2022). doi:10.1017/9781009157926.001.

18. Riahi, K. *et al.* Mitigation pathways compatible with long-term goals. in *IPCC, 2022: Climate Change 2022: Mitigation of Climate Change. Contribution of Working Group III to the Sixth Assessment Report of the Intergovernmental Panel on Climate Change* (eds. Shukla, P. R. et al.) (Cambridge University Press, 2022). doi:10.1017/9781009157926.005.

19. Hanssen, S. V *et al.* The climate change mitigation potential of bioenergy with carbon capture and storage. *Nat. Clim. Chang.* **10**, 1023–1029 (2020).

20. Stenzel, F. *et al.* Irrigation of biomass plantations may globally increase water stress more than climate change. *Nat. Commun.* **12**, 1512 (2021).

21. Fonte, C. Avaliação de Rota de Produção de Eletrocombustíveis para Aviação Utilizando Eletricidade Solar Fotovoltaica e Captura de Dióxido de Carbono Diretamente do Ar. (Universidade Federal do Rio de Janeiro, 2021).

22. Qiu, Y. *et al.* Environmental trade-offs of direct air capture technologies in climate change mitigation toward 2100. *Nat. Commun.* **13**, 3635 (2022).

23. DNV GL. *Maritime Forecast to 2050*. (2022).

24. Pavlenko, N., Comer, B., Zhou, Y., Clark, N. & Rutherford, D. The climate implications of using LNG as a marine fuel. *Swedish Environ. Prot. Agency Stock. Sweden* (2020).

25. E3-Modelling. PRIMES model version 2018 - Detailed model description. www.e3.modelling.com (2018).

26. European Commission. EU Reference Scenario 2020. europa.eu (2020).

27. European Commission. The European Green Deal. (2019).
